# Supplementary material for: The Patterns of Coevolution in Clade B HIV Envelope's N-Glycosylation Sites
Source: PubMed Central journal article supplement (PMC4482261; doi:10.1371/journal.pone.0128664), 2015-06-25

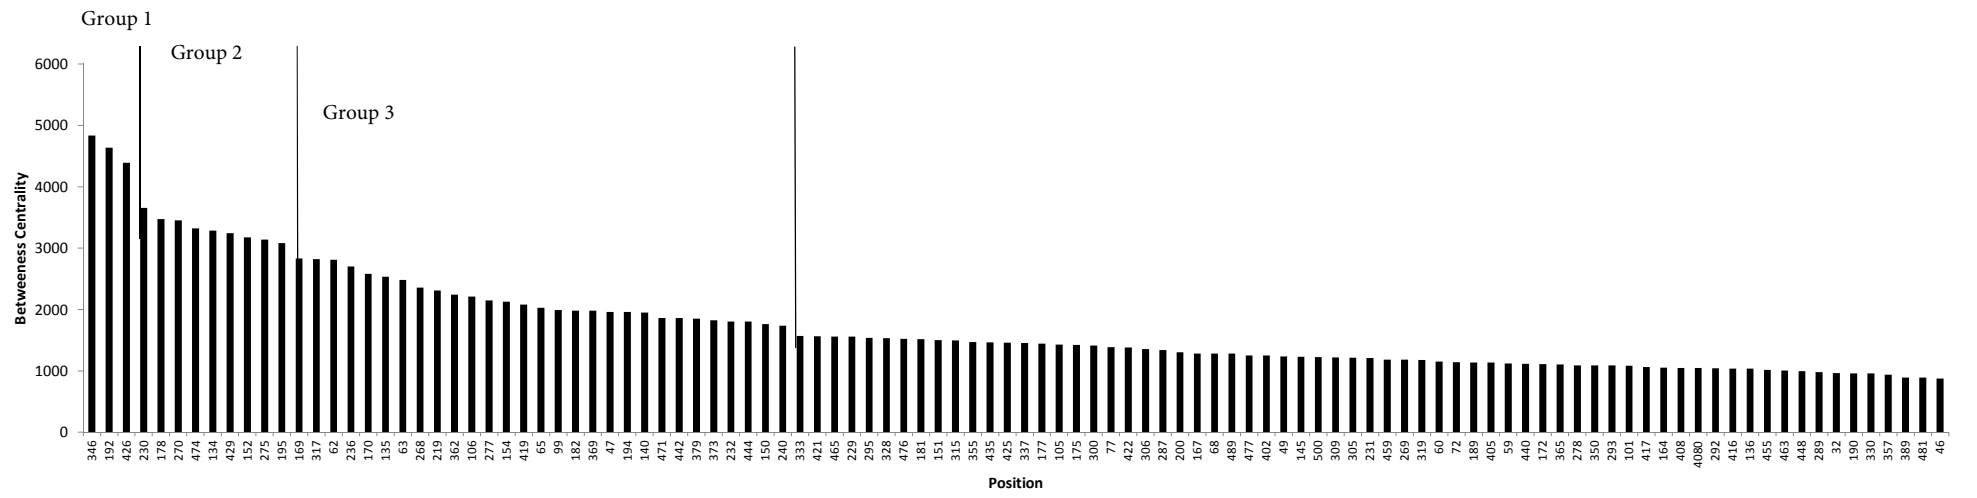

Supplement: pone.0128664.s003.pdf [file pone.0128664.s003.pdf]
