# Supplementary material for: The Patterns of Coevolution in Clade B HIV Envelope's N-Glycosylation Sites
Source: PubMed Central journal article supplement (PMC4482261; doi:10.1371/journal.pone.0128664), 2015-06-25
Supplement: pone.0128664.s004.pdf [file pone.0128664.s004.pdf]

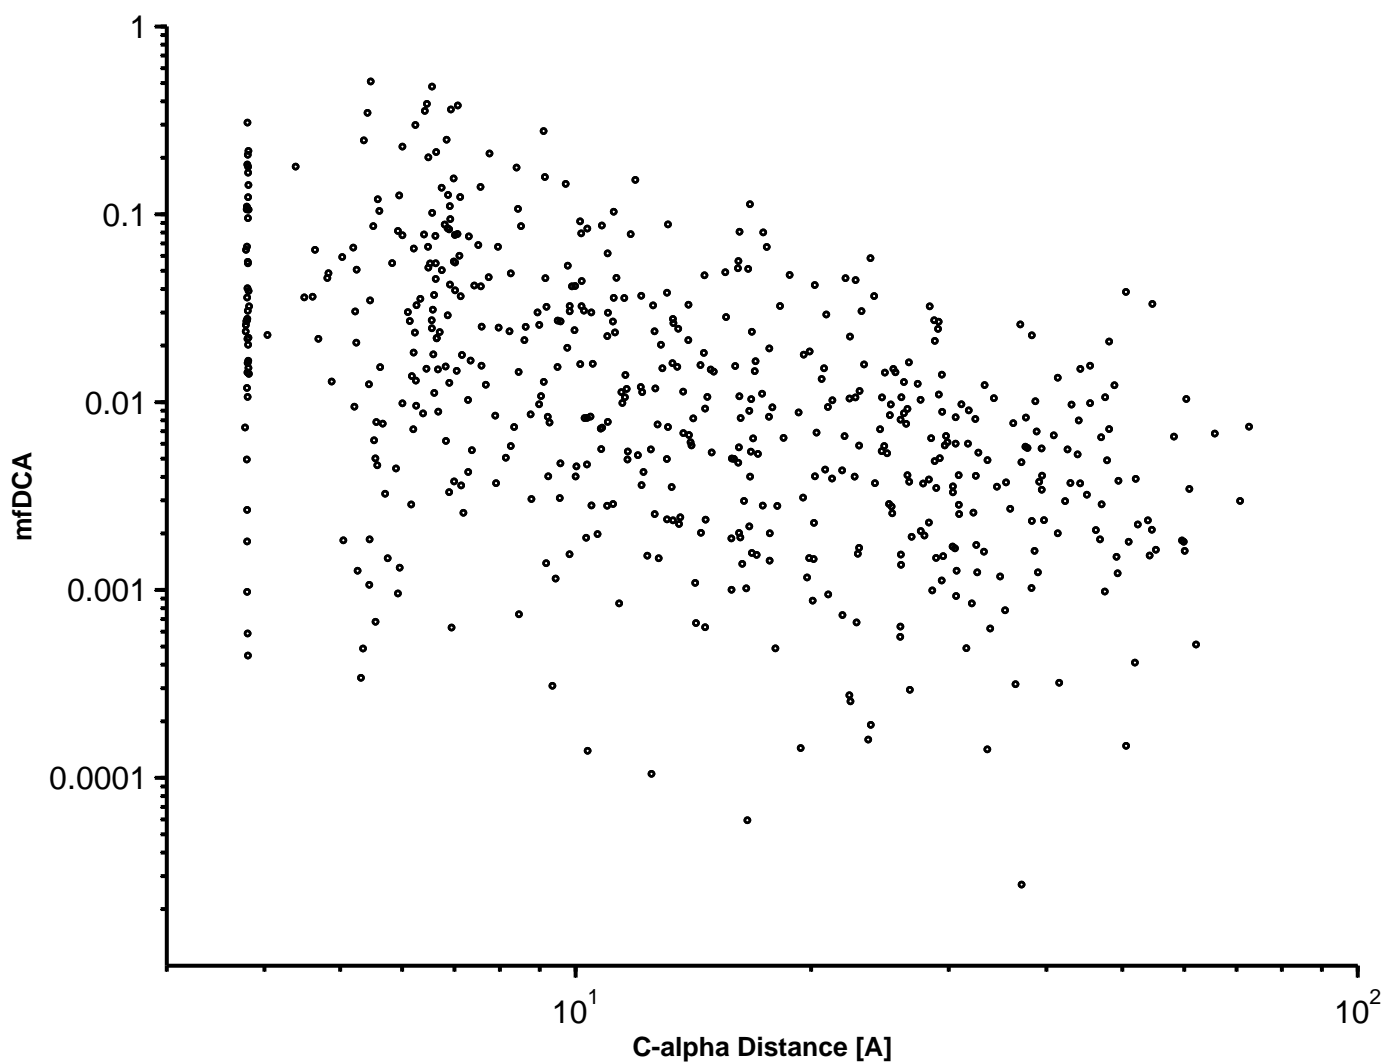

S8 Fig. As expected, the intensity of the mfDCA correlation for the significant couplings decreased with the distance and this decrease was roughly proportional to the square of the distance between the Ca atoms of the residues.
